# Supplementary material
Source: PubMed Central journal article supplement (PMC9661462)
Supplement: 11655_2022_3686_MOESM1_ESM.pdf [file 11655_2022_3686_MOESM1_ESM.pdf]

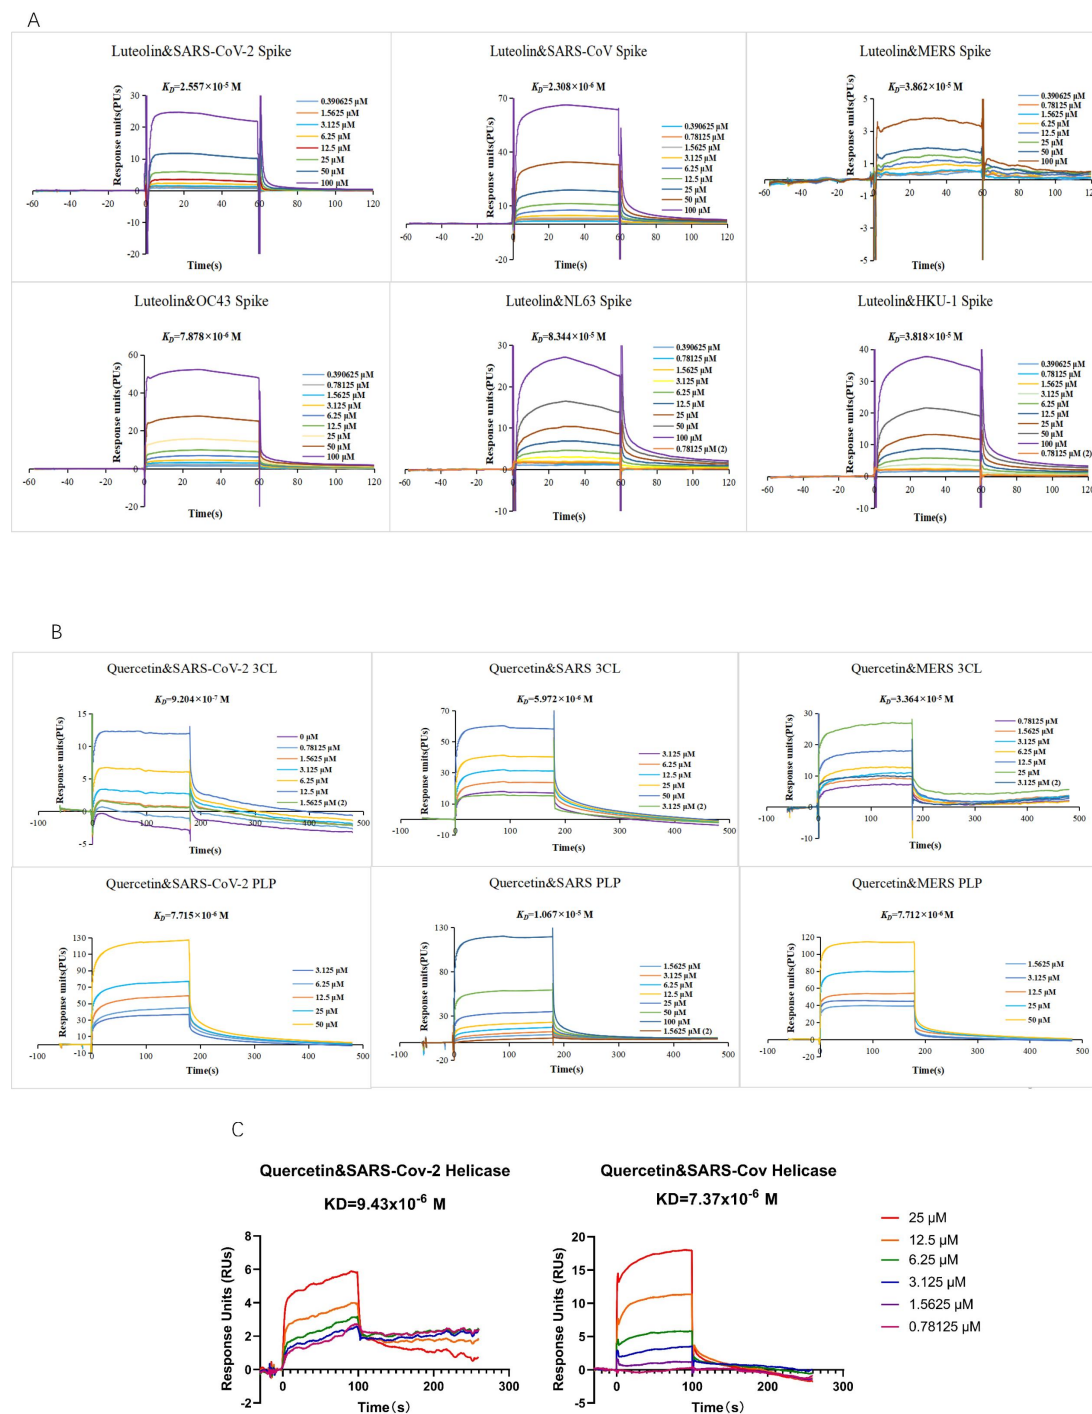

### Appendix 1. SPR-Based Binder Identification of Luteolin and Quercetin

Notes: (A) Sensograms of luteolin interacting with SARS-CoV-2-S2, SARS-S2, MERS-S, OC43-S, NL63-S, and HKU-1-S. (B) Sensograms of quercetin interacting with SARS-CoV-2-3CLpro, SARS-3CLpro, MERS-3CLpro, SARS-CoV-2-PLpro, SARS-PLpro, and MERS-PLpro. (C) Sensograms of quercetin interacting with SARS-CoV-2-helicase and SARS-CoV-helicase
